# Supplementary material
Source: publisher site journal article supplement (https://www.spandidos-publications.com/7750/downloadSupplementary)
Supplement: Supplementary file 1 [file downloadSupplementary]

## Sheet: Supplementary file 3
Table SIV. 28 types of immune cells were causally related to IVDD.
id.exposure	id.outcome	outcome	exposure	method	nsnp	b	se	pval	lo_ci	up_ci	or	or_lci95	or_uci95	fdr
GCST90001402	finngen_R5_M13_LOWBACKPAINORANDSCIATICA	IVDD	Sw mem %B cell	Inverse variance weighted	13	-0.240775	0.117441	0.0403472	-0.470961	-0.0105904	0.786018	0.624402	0.989465	0.0416333
GCST90001556	finngen_R5_M13_LOWBACKPAINORANDSCIATICA	IVDD	EM CD8br %T cell	Inverse variance weighted	14	0.152199	0.0655102	0.0201637	0.0237991	0.280599	1.16439	1.02408	1.32392	0.0362296
GCST90001594	finngen_R5_M13_LOWBACKPAINORANDSCIATICA	IVDD	DP (CD4+CD8+) AC	Inverse variance weighted	18	-0.293017	0.120305	0.0148667	-0.528816	-0.0572184	0.746009	0.589302	0.944388	0.0362296
GCST90001614	finngen_R5_M13_LOWBACKPAINORANDSCIATICA	IVDD	CD8br and CD8dim %leukocyte	Inverse variance weighted	14	0.354526	0.159563	0.0262928	0.041783	0.667268	1.4255	1.04267	1.94891	0.0362296
GCST90001639	finngen_R5_M13_LOWBACKPAINORANDSCIATICA	IVDD	CD3- lymphocyte AC	Inverse variance weighted	16	-0.25468	0.124283	0.0404438	-0.498276	-0.0110846	0.775164	0.607577	0.988977	0.0416333
GCST90001649	finngen_R5_M13_LOWBACKPAINORANDSCIATICA	IVDD	HLA DR+ NK %NK	Inverse variance weighted	23	0.188094	0.0826004	0.0227771	0.0261969	0.34999	1.20695	1.02654	1.41905	0.0362296
GCST90001650	finngen_R5_M13_LOWBACKPAINORANDSCIATICA	IVDD	HLA DR+ NK %CD3- lymphocyte	Inverse variance weighted	22	0.254226	0.0847755	0.00271032	0.088066	0.420386	1.28946	1.09206	1.52255	0.0229347
GCST90001659	finngen_R5_M13_LOWBACKPAINORANDSCIATICA	IVDD	CD39+ CD4+ %CD4+	Inverse variance weighted	25	-0.155923	0.0534693	0.00354418	-0.260723	-0.0511229	0.855625	0.770495	0.950162	0.0229347
GCST90001810	finngen_R5_M13_LOWBACKPAINORANDSCIATICA	IVDD	CD38 on CD3- CD19-	Inverse variance weighted	17	-0.240967	0.0980378	0.0139751	-0.433121	-0.0488133	0.785867	0.648482	0.952359	0.0362296
GCST90001819	finngen_R5_M13_LOWBACKPAINORANDSCIATICA	IVDD	CD38 on transitional	Inverse variance weighted	22	-0.20724	0.0765793	0.00680566	-0.357335	-0.0571441	0.812825	0.699538	0.944458	0.0264664
GCST90001821	finngen_R5_M13_LOWBACKPAINORANDSCIATICA	IVDD	IgD on IgD+ CD24-	Inverse variance weighted	29	0.193187	0.0662907	0.00356564	0.0632568	0.323116	1.21311	1.0653	1.38143	0.0229347
GCST90001824	finngen_R5_M13_LOWBACKPAINORANDSCIATICA	IVDD	IgD on IgD+ CD38br	Inverse variance weighted	24	0.179437	0.0688855	0.00919119	0.0444215	0.314453	1.19654	1.04542	1.36951	0.0321692
GCST90001825	finngen_R5_M13_LOWBACKPAINORANDSCIATICA	IVDD	IgD on IgD+ CD38dim	Inverse variance weighted	22	0.15383	0.0622676	0.0134936	0.0317857	0.275875	1.16629	1.0323	1.31768	0.0362296
GCST90001853	finngen_R5_M13_LOWBACKPAINORANDSCIATICA	IVDD	CD3 on activated Treg	Inverse variance weighted	19	-0.189283	0.0688002	0.00593776	-0.324131	-0.0544346	0.827552	0.723155	0.94702	0.0259777
GCST90001855	finngen_R5_M13_LOWBACKPAINORANDSCIATICA	IVDD	CD3 on secreting Treg	Inverse variance weighted	20	-0.162889	0.0732758	0.0262186	-0.30651	-0.0192685	0.849685	0.736011	0.980916	0.0362296
GCST90001857	finngen_R5_M13_LOWBACKPAINORANDSCIATICA	IVDD	CD3 on activated & secreting Treg	Inverse variance weighted	20	-0.146785	0.0667811	0.0279485	-0.277676	-0.0158945	0.863479	0.757542	0.984231	0.0362296
GCST90001860	finngen_R5_M13_LOWBACKPAINORANDSCIATICA	IVDD	CD3 on CD39+ CD4+	Inverse variance weighted	27	-0.128214	0.0579843	0.0270225	-0.241864	-0.0145652	0.879665	0.785163	0.98554	0.0362296
GCST90001862	finngen_R5_M13_LOWBACKPAINORANDSCIATICA	IVDD	CD3 on CD28+ DN (CD4-CD8-)	Inverse variance weighted	14	0.199347	0.0824144	0.0155702	0.0378149	0.360879	1.22061	1.03854	1.43459	0.0362296
GCST90001882	finngen_R5_M13_LOWBACKPAINORANDSCIATICA	IVDD	HVEM on CM CD8br	Inverse variance weighted	17	0.120419	0.058654	0.040069	0.00545696	0.235381	1.12797	1.00547	1.26539	0.0416333
GCST90001932	finngen_R5_M13_LOWBACKPAINORANDSCIATICA	IVDD	CD127 on CD45RA+ CD4+	Inverse variance weighted	19	0.231449	0.102818	0.0243828	0.0299246	0.432973	1.26042	1.03038	1.54183	0.0362296
GCST90001938	finngen_R5_M13_LOWBACKPAINORANDSCIATICA	IVDD	CD25 on CD39+ resting Treg	Inverse variance weighted	15	-0.382365	0.1326	0.00393166	-0.642262	-0.122469	0.682246	0.526101	0.884734	0.0229347
GCST90001943	finngen_R5_M13_LOWBACKPAINORANDSCIATICA	IVDD	CD25 on activated & secreting Treg	Inverse variance weighted	20	-0.146669	0.0422242	0.000513559	-0.229429	-0.0639099	0.863579	0.794987	0.93809	0.0179746
GCST90001969	finngen_R5_M13_LOWBACKPAINORANDSCIATICA	IVDD	FSC-A on NK	Inverse variance weighted	18	0.175065	0.0871102	0.0444639	0.00432859	0.345801	1.19132	1.00434	1.41312	0.0444639
GCST90001971	finngen_R5_M13_LOWBACKPAINORANDSCIATICA	IVDD	FSC-A on lymphocyte	Inverse variance weighted	16	-0.221648	0.0711393	0.00183514	-0.361081	-0.0822151	0.801197	0.696922	0.921074	0.0229347
GCST90001972	finngen_R5_M13_LOWBACKPAINORANDSCIATICA	IVDD	FSC-A on T cell	Inverse variance weighted	21	-0.119128	0.0550063	0.0303326	-0.226941	-0.0113159	0.887694	0.796968	0.988748	0.0379158
GCST90002014	finngen_R5_M13_LOWBACKPAINORANDSCIATICA	IVDD	CCR2 on CD62L+ myeloid DC	Inverse variance weighted	14	0.232764	0.103993	0.0252033	0.0289384	0.43659	1.26208	1.02936	1.54742	0.0362296
GCST90002030	finngen_R5_M13_LOWBACKPAINORANDSCIATICA	IVDD	CD39 on CD39+ activated Treg	Inverse variance weighted	22	-0.185554	0.0780928	0.0174981	-0.338616	-0.0324922	0.830644	0.712756	0.96803	0.0362296
GCST90002061	finngen_R5_M13_LOWBACKPAINORANDSCIATICA	IVDD	CD4 on CD39+ CD4+	Inverse variance weighted	24	0.0310567	0.013784	0.0242527	0.00404012	0.0580733	1.03154	1.00405	1.05979	0.0362296
